# Supplementary material
Source: publisher site journal article supplement (https://www.dovepress.com/article/414213)
Supplement: Supplementary file 1 [file get_supplementary_file.php]

## Supplementary materials

- 1- The survey (English translated)  
<https://forms.gle/o3WCM8YnKtbrnqZYA>
- 2- The survey ( google form designed questionnaire) : page 2-20
- 3- Significance testing analysis tables
  - Table S1: Did you feel you have to answer faithfully?
  - Table S2: Do you mind if any family member is present during medical interview and being asked about.....?
  - Table S3. If the physician explained to you the importance of the social enquiry about ..., would that change your attitude/answer?
  - Table S4. Would you agree that your answers be documented in your medical records?
  - Table S5. Would you agree that your answers be documented in your medical records?
  - Table S6. Would the doctor's sex affect your answers?
  - Table S7. Would conducting the interview in ... affect your answers to questions about your job, income, marital status, housing condition, or travel?
  - Table S8. Would conducting the interview in ... affect your answers to questions about smoking, illicit drugs, or illegal sexual behaviors?

جامعة الملك خالد

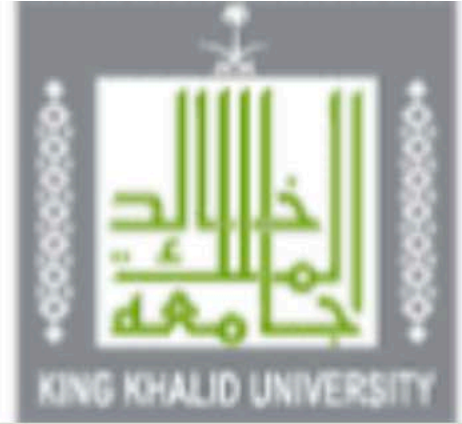

# Attitude of Physicians and Patients toward Social History taking in Saudi Arabia

This study aims to explore the magnitude of the problem from both patients and doctors' perspective. Based on the findings, The study might suggest methods to improve social history teaching about how to obtain socially appropriate social history taking.

Dear Participant, This research aims to explore public and health care workers (physicians) ideas about social aspects of illnesses that are commonly collected during medical interview. It aims to identify difficulties to collect proper social history and to suggest improvement. This research is approved by KKU – IRB ( ECM#2022-1908..) and is conducted by medical students and college staffs from the college of medicine, KKU. The data collections is completely anonymous . it does not involve – whatsoever, collection of any personal or identifying information. The participation is voluntary .

For any questions or clarification, please contact us at this email \*\*\*\*\*@[kku.edu.sa](mailto:*****@kku.edu.sa)

عزيزي المشارك

هذا البحث يتعلق باستطلاع آراء العامة من أطباء ومرضى وغيرهم بخصوص التاريخ الاجتماعي للمريض ( الحالة الاجتماعية والعادات ) والذي يتم جمعه -عادة - بشكل روتيني كجزء مهم من التاريخ المرضي عند زيارة المريض لطبيبه

و يتم عمله ECM#2022-1908 هذا البحث تمت الموافقة عليه من لجنة أخلاقيات البحث العلمي بجامعة الملك خالد برقم بواسطة طلبة وأساتذة من كلية الطب بجامعة الملك خالد

الهدف من هذا البحث هي فائدة مجتمعية وتحسين العملية التشخيصية وعلاقة الطبيب بالمريض بشكل عام. المشاركة في هذا البحث هي طوعية تماما. لا يوجد تعويض أو مكافئة للمشاركة في هذا البحث. لا يتم جمع أية بيانات شخصية في هذا البحث

\* هل توافق على المشاركة في هذا الإستبيان؟ / Do you agree to participate in this survey?

نعم

لا

Next

Clear form

We will ask you here about your opinion about social history taken during the medical interview

To clarify:

Medical history: It is a group of questions that the doctor asks to reach a diagnosis of the disease.

Social history: A part of the medical history in which it is asked about the social status in general, such as the nature of work, income, housing, and marital status, and about personal habits such as smoking, drinking alcohol, sexual relations outside marriage, and whether social support is available (the presence of a person who supports the patient psychologically or financially or other types of support) that may affect his health

We repeat that all answers and information collected in this questionnaire are strictly confidential and will only be used for scientific and educational purposes only.

سوف نسألك هنا عن رأيك في التاريخ الاجتماعي الذي يُأخذ خلال التاريخ المرضي

للتوضيح:

التاريخ المرضي: هي مجموعة من أسئلة التي يسألها الطبيب للتوصل لتشخيص المرض

التاريخ الاجتماعي: جزء من التاريخ المرضي يُسأل فيها عن الحالة الاجتماعية بشكل عام مثل طبيعة العمل والدخل والمسكن والحالة الزوجية، وعن العادات الشخصية مثل التدخين وإيضاً شرب الكحول والعلاقات الجنسية خارج إطار الزواج ، وعن ما إذا كان يتوفر دعم اجتماعي (تواجد شخص يدعم المريض نفسياً او مادياً او غير ذلك من أنواع الدعم ) التي من الممكن أن تؤثر على صحته ونكرر جميع الإجابات و المعلومات المجموعة في هذا الاستبيان في غاية السرية ولن تستخدم إلا لغرض علمي وللاستفادة التعليمية فقط.

Have you been admitted before to the hospital, OPD , private , general care ? how many times? \ هل سبق لك أن دخلت إلى المستشفى، العيادات الخارجية، الرعاية الصحية العامة او الخاصة؟ \*

مرة واحدة

Have you been interviewed before by a physician (trainee or certified), in which setting? How Many times? \ هل أخذ الطبيب\المتدرب تاريخك المرضي خلال الزيارة؟ \*

نعم

During medical interview; have you been asked about the following? / أثناء أخذ \*

الطبيب\المتدرب لتاريخك المرضي، هل سئلت عن التالي؟

|                                               | Yes/نعم               | No/لا                 |
|-----------------------------------------------|-----------------------|-----------------------|
| job \ المهنة                                  | <input type="radio"/> | <input type="radio"/> |
| income \ الدخل السنوي\الشهري                  | <input type="radio"/> | <input type="radio"/> |
| marital status \ الحالة<br>الاجتماعية\الزوجية | <input type="radio"/> | <input type="radio"/> |
| housing \ السكن                               | <input type="radio"/> | <input type="radio"/> |
| Animal contact ( pets or<br>domestic animals) | <input type="radio"/> | <input type="radio"/> |
| smoking \ التدخين                             | <input type="radio"/> | <input type="radio"/> |
| alcohol \ شرب الكحول                          | <input type="radio"/> | <input type="radio"/> |
| sexual contact \ العلاقة الجنسية              | <input type="radio"/> | <input type="radio"/> |
| Travel                                        | <input type="radio"/> | <input type="radio"/> |

\* هل شرح \ Did you receive any explanation about why the question is being asked ?

لك الطبيب\المتدرب الهدف من السؤال عن التالي؟

|                                            | نعم                   | لا                    |
|--------------------------------------------|-----------------------|-----------------------|
| المهنة الحالية/ job                        | <input type="radio"/> | <input type="radio"/> |
| الدخل الشهري / السنوي income               | <input type="radio"/> | <input type="radio"/> |
| الحالة الاجتماعية/ marital status          | <input type="radio"/> | <input type="radio"/> |
| السكن/ housing                             | <input type="radio"/> | <input type="radio"/> |
| Animal contact ( pets or domestic animals) | <input type="radio"/> | <input type="radio"/> |
| التدخين/ smoking                           | <input type="radio"/> | <input type="radio"/> |
| شرب الكحول/ alcohol                        | <input type="radio"/> | <input type="radio"/> |
| العلاقة الجنسية/ sexual contact            | <input type="radio"/> | <input type="radio"/> |
| Travel                                     | <input type="radio"/> | <input type="radio"/> |





\* كيف تقيم السؤال من ناحية \ ( needed) ؟ Did you feel / know the question was necessary ( needed) ?  
الأهمية؟

ضروري

غير ضروري

المهنة الحالية job

الدخل السنوي \ الشهري income

الحالة الاجتماعية / marital status  
الزوجية

السكن housing

Animal contact (pets or  
domestic animals)

التدخين smoking

شرب الكحول. alcohol.

العلاقة الجنسية sexual contact

Travel

هل تشعر بأن عليك أن تجيب؟ Did you feel you have to answer the question faithfully? \*

بمصادقية تامة؟

نعم

لا

المهنة الحالية job

الدخل الشهري / السنوي income

الحالة الاجتماعية / marital status  
الزوجية

السكن housing

Animal contact (pets or  
domestic animals)

التدخين smoking

شرب الكحول alcohol

العلاقة الجنسية sexual contact

Travel

Do you feel it is okay to be asked about it while family member is present? هل تمانع \*

وجود أحد أفراد الأسرة أثناء سؤالك عن التالي؟

|                                              | امانع                 | لا امانع              |
|----------------------------------------------|-----------------------|-----------------------|
| job المهنة الحالية                           | <input type="radio"/> | <input type="radio"/> |
| income الدخل الشهري / السنوي                 | <input type="radio"/> | <input type="radio"/> |
| marital status / الحالة الاجتماعية / الزوجية | <input type="radio"/> | <input type="radio"/> |
| housing السكن                                | <input type="radio"/> | <input type="radio"/> |
| Animal contact (pets or domestic animals)    | <input type="radio"/> | <input type="radio"/> |
| smoking التدخين                              | <input type="radio"/> | <input type="radio"/> |
| alcohol شرب الكحول                           | <input type="radio"/> | <input type="radio"/> |
| sexual contact العلاقة الجنسية               | <input type="radio"/> | <input type="radio"/> |
| travel                                       | <input type="radio"/> | <input type="radio"/> |

The doctor may need to ask about the social status such as job, income level and \* marriage for various reasons, including building a healthy relationship with the patient and the importance of knowing the patient's social background when explaining the disease and discussing treatment plans and others. In the event that the doctor explains the importance of taking a marital status history; Will this change your answer to the following questions?

قد يحتاج الطبيب أن يسأل عن الحالة الاجتماعية مثل الوظيفة ومستوى الدخل والزواج لأسباب متعددة من ضمنها بناء علاقة صحية مع المريض ولأهمية معرفة الخلفية الاجتماعية للمريض عند شرح المرض و مناقشة الخطط العلاجية وغيرها. في حالة قيام الطبيب بشرح أهمية أخذ تاريخ الحالة الاجتماعية؛ هل سيغير ذلك في إجابتك علي الاسئلة التالية؟

سأغير إجاباتي

لن تتغير إجاباتي

job المهنة الحالية

income الدخل الشهري/ السنوي

marital status / الحالة الاجتماعية /  
الزوجية

housing السكن

Animal contact (pets or  
domestic animals)

Some social habits may be strongly associated with some diseases, and they are usually asked about routinely, such as smoking, traveling to endemic areas, and others. If it was made clear that the question about these habits is a routine procedure and has nothing to do with your current visit to the patient, will that change your answer to the following questions? \*

قد ترتبط بعض العادات الاجتماعية ارتباطاً قوياً ببعض الأمراض ويتم السؤال عنها عادة بشكل روتيني مثل التدخين السفر إلى المناطق الموبوءة وغيره. إذا تم ايضاح أن السؤال عن هذه العادات هي إجراء روتيني وليس له علاقة بزيارتك الحالية للمريض هل سيغير ذلك من إجابتك على الاسئلة التالية .

سأغير إجاباتي

لن تتغير إجاباتي

alcohol intake شرب الكحول

smoking التدخين

sexual contact العلاقة الجنسية

Travel

would u agree to document your answers regarding the following on the medical records orkept verbal? في حال سنلت عن التالي، هل ستوافق على تدوين جوابك في سجلك المرضي؟ (لا إن كنت تفضل ابقاءه جوابًا لفظيًا) \*

نعم

لا

Job المهنة الحالية

income الدخل الشهري \ السنوي

marital status الحالة الاجتماعية /  
الزوجية

housing

Animal contact (pets or  
domestic animals)

alcohol intake شرب الكحول

smoking التدخين

sexual contact العلاقة الجنسية

Travel

if you have been giving a form to complete including social questioning , do you think it is easier to report habits comparing to face to face interview ? في حال تم إعطائك نموذج ورقي يشمل أسئلة التاريخ الاجتماعي المذكورة أعلاه، هل سيكون من الأسهل الإجابة عليها مقارنة بالإجابة عنها أثناء مقابلة الطبيب(وجهاً لوجه)؟ \*

نعم

لا

If you have been asked this question (s) by a student , resident , MRP : most responsible physician(MRP) , social worker , would that affect your answers ? عند أخذ تاريخك الاجتماعي من قبل طالب، متدرب، أخصائي إجتماعي، او الطبيب المسؤول عن حالتك، هل سيؤثر ذلك في اجاباتك؟ \*

نعم

لا

Intern طالب متدرب

Resident طبيب متدرب

Social-Aخصائي اجتماعي - غير طبيب  
worker

Attending/ consultant



هل يؤثر مكان أخذ التاريخ المرضي على اجابتك على أسئلة التاريخ الاجتماعي

\*

Would the place where the medical interview is conducted would affect your answers.

|                                                        | نعم                   | لا                    |
|--------------------------------------------------------|-----------------------|-----------------------|
| Private room . غرفة خاصة / العيادة                     | <input type="radio"/> | <input type="radio"/> |
| غرفة مستشفى / متعددة الأسرة<br>Multibedded room        | <input type="radio"/> | <input type="radio"/> |
| Emergency Room في الطوارئ                              | <input type="radio"/> | <input type="radio"/> |
| With وجود التمريض أو شخص آخر<br>nursing present        | <input type="radio"/> | <input type="radio"/> |
| With a وجود أحد أفراد العائلة<br>family member present | <input type="radio"/> | <input type="radio"/> |

If you have been asked these questions early on / versus late on the medical interview , would that affect ? your answers / عند أخذ تاريخك المرضي هل سيؤثر إن كانت هذه / الأسئلة في بداية التاريخ المرضي او في نهايته؟

\*

- Early better / أفضل في البداية
- Late better / أفضل في النهاية
- No Effect / لا يؤثر

## Bio-Demographic data : البيانات الشخصية

العمر. Age \*

الجنس Sex \*

Male

Female

المهنة. Job \*

في حال وجود وظيفة لأي جهة تعمل؟

المستوى التعليمي. Education level \*

Choose

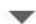

المنطقة. Region \*

Choose

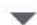

Back

Submit

Clear form

# استطلاع الآراء بخصوص أخذ التاريخ الاجتماعي (الحالة والعادات الاجتماعية) كجزء من التاريخ المرضي عند مقابلة الطبيب

عزيزي المشارك

هذا البحث يتعلق باستطلاع آراء عامة الناس بخصوص التاريخ الاجتماعي للمريض (الحالة الاجتماعية والعادات) والذي يتم جمعه -عادة - بشكل روتيني كجزء مهم من التاريخ المرضي عند زيارة المريض لطبيبه.

هذا البحث تمت الموافقة عليه من لجنة أخلاقيات البحث العلمي بجامعة الملك خالد برقم ECM#2022-1908 و يتم عمله بواسطة طلبة وأساتذة من كلية الطب بجامعة الملك خالد

الهدف من هذا البحث هي الفائدة المجتمعية، تحسين العملية التشخيصية، وعلاقة الطبيب بالمريض بشكل عام. المشاركة في هذا البحث هي طوعية تماما. لا يوجد تعويض أو مكافئة للمشاركة في هذا البحث. يستغرق هذا الإستبيان 5 دقائق، ونشكرك مقدماً على الموافقة على المشاركة في هذا الاستبيان.

إذا كان لديك أي استفسار يمكنك التواصل معنا عبر البريد التالي: [social.history.research@gmail.com](mailto:social.history.research@gmail.com)

\* هل توافق على المشاركة في هذا الإستبيان؟

نعم

لا

# استطلاع الآراء بخصوص أخذ التاريخ الاجتماعي (الحالة والعادات الاجتماعية) كجزء من التاريخ المرضي عند مقابلة الطبيب

 halkhaldy@kku.edu.sa (not shared) [Switch account](#)

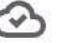

\* Required

## مقدمة

سوف نسألك هنا عن رأيك في التاريخ الاجتماعي الذي يُؤخذ خلال التاريخ المرضي

للتوضيح:

التاريخ المرضي: هي مجموعة من الأسئلة التي يسألها الطبيب للمريض بهدف التوصل لتشخيص المرض.

التاريخ الاجتماعي: جزء من التاريخ المرضي يُسأل فيها المريض عادة عن الحالة الاجتماعية بشكل عام مثل طبيعة العمل، الدخل، المسكن، الحالة الزوجية، وعن العادات الشخصية مثل التدخين وغيرها من العادات التي من الممكن أن تؤثر على صحته.

جميع الإجابات والمعلومات التي سيتم جمعها في هذا الاستبيان في غاية السرية ولن يطلع عليها سوى الفريق البحثي القائم على الدراسة.

\* هل سبق لك أن دخلت إلى المستشفى كمريض، سواءً لقسم الطوارئ، التنويم أو العيادات الخارجية؟

Choose

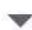

سوف نسألك هنا عن رأيك في التاريخ الإجتماعي الذي يُؤخذ خلال التاريخ المرضي

للتوضيح:

التاريخ المرضي: هي مجموعة من الأسئلة التي يسألها الطبيب للمريض بهدف التوصل لتشخيص المرض.

التاريخ الاجتماعي: جزء من التاريخ المرضي يُسأل فيها المريض عادة عن الحالة الاجتماعية بشكل عام مثل طبيعة العمل، الدخل، المسكن، الحالة الزوجية، وعن العادات الشخصية مثل التدخين وغيرها من العادات التي من الممكن أن تؤثر على صحته.

جميع الإجابات والمعلومات التي سيتم جمعها في هذا الاستبيان في غاية السرية ولن يطلع عليها سوى الفريق البحثي القائم على الدراسة.

\* هل سبق لك أن دخلت إلى المستشفى كمريض، سواءً لقسم الطوارئ ، التنويم أو العيادات الخارجية؟

Choose

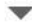

\* هل أخذ الطبيب\المتدرب تاريخك المرضي خلال الزيارة؟

Choose

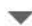

\* أثناء أخذ الطبيب\المتدرب لتاريخك المرضي، هل سُئلت عن التالي؟

|                                                                 | نعم                   | لا                    |
|-----------------------------------------------------------------|-----------------------|-----------------------|
| المهنة                                                          | <input type="radio"/> | <input type="radio"/> |
| الدخل                                                           | <input type="radio"/> | <input type="radio"/> |
| الحالة الاجتماعية\الزوجية (مثلا متزوج/<br>ة، مطلق/ة، إلى آخره.) | <input type="radio"/> | <input type="radio"/> |
| السكن (إيجار، مُلك، إلى آخره.)                                  | <input type="radio"/> | <input type="radio"/> |
| اقتناء الحيوانات الأليفة /تربية الحيوانات                       | <input type="radio"/> | <input type="radio"/> |
| السفر                                                           | <input type="radio"/> | <input type="radio"/> |
| التدخين                                                         | <input type="radio"/> | <input type="radio"/> |
| شرب الكحول                                                      | <input type="radio"/> | <input type="radio"/> |
| تعاطي المخدرات                                                  | <input type="radio"/> | <input type="radio"/> |
| العلاقة الجنسية خارج إطار الزواج                                | <input type="radio"/> | <input type="radio"/> |



\* هل شرح لك الطبيب\المتدرب الهدف من السؤال عن التالي؟

|                                                                 | نعم                   | لا                    |
|-----------------------------------------------------------------|-----------------------|-----------------------|
| المهنة                                                          | <input type="radio"/> | <input type="radio"/> |
| الدخل                                                           | <input type="radio"/> | <input type="radio"/> |
| الحالة الاجتماعية\الزوجية (مثلا متزوج/<br>ة، مطلق/ة، إلى آخره.) | <input type="radio"/> | <input type="radio"/> |
| السكن (إيجار، مُلك، إلى آخره.)                                  | <input type="radio"/> | <input type="radio"/> |
| اقتناء الحيوانات الأليفة/تربية الحيوانات                        | <input type="radio"/> | <input type="radio"/> |
| السفر                                                           | <input type="radio"/> | <input type="radio"/> |
| التدخين                                                         | <input type="radio"/> | <input type="radio"/> |
| شرب الكحول                                                      | <input type="radio"/> | <input type="radio"/> |
| تعاطي المخدرات                                                  | <input type="radio"/> | <input type="radio"/> |
| العلاقة الجنسية خارج إطار الزواج                                | <input type="radio"/> | <input type="radio"/> |

هنا سنسألك بشكل عام عن رأيك / شعورك تجاه السؤال عن الحالة والعادات الاجتماعية

\* إذا تم سؤالك عن النقاط التالية ، ماهو شعورك تجاه السؤال؟

|                                                                 | مقبول                            | غير مقبول             |
|-----------------------------------------------------------------|----------------------------------|-----------------------|
| المهنة                                                          | <input type="radio"/>            | <input type="radio"/> |
| الدخل                                                           | <input type="radio"/>            | <input type="radio"/> |
| الحالة الاجتماعية\الزوجية (مثلا متزوج/<br>ة، مطلق/ة، إلى آخره.) | <input type="radio"/>            | <input type="radio"/> |
| السكن (إيجار، مُلك، إلى آخره.)                                  | <input checked="" type="radio"/> | <input type="radio"/> |
| اقتناء الحيوانات الأليفة / تربية الحيوانات                      | <input type="radio"/>            | <input type="radio"/> |
| العيش أو العمل في مزرعة                                         | <input type="radio"/>            | <input type="radio"/> |
| السفر                                                           | <input type="radio"/>            | <input type="radio"/> |
| التدخين                                                         | <input type="radio"/>            | <input type="radio"/> |
| شرب الكحول                                                      | <input type="radio"/>            | <input type="radio"/> |
| تعاطي المخدرات                                                  | <input type="radio"/>            | <input type="radio"/> |
| العلاقة الجنسية خارج إطار الزواج                                | <input type="radio"/>            | <input type="radio"/> |

\* كيف تقيم السؤال من ناحية الأهمية؟

مهم

غير مهم

المهنة

الدخل

الحالة الاجتماعية\الزوجية (مثلا متزوج/  
ة، مطلق/ة، إلى آخره.)

السكن (إيجار، مُلك، إلى آخره.)

اقتناء الحيوانات الأليفة / تربية الحيوانات

السفر

التدخين

شرب الكحول

تعاطي المخدرات

العلاقة الجنسية خارج إطار الزواج

\* هل تشعر بأن عليك أن تجيب بمصادقية تامة؟

|                                                                 | نعم                   | لا                    |
|-----------------------------------------------------------------|-----------------------|-----------------------|
| المهنة                                                          | <input type="radio"/> | <input type="radio"/> |
| الدخل                                                           | <input type="radio"/> | <input type="radio"/> |
| الحالة الاجتماعية\الزوجية (مثلا متزوج/<br>ة، مطلق/ة، إلى آخره.) | <input type="radio"/> | <input type="radio"/> |
| السكن (إيجار، مُلك، إلى آخره.)                                  | <input type="radio"/> | <input type="radio"/> |
| اقتناء الحيوانات الأليفة / تربية الحيوانات                      | <input type="radio"/> | <input type="radio"/> |
| السفر                                                           | <input type="radio"/> | <input type="radio"/> |
| التدخين                                                         | <input type="radio"/> | <input type="radio"/> |
| شرب الكحول                                                      | <input type="radio"/> | <input type="radio"/> |
| تعاطي المخدرات                                                  | <input type="radio"/> | <input type="radio"/> |
| العلاقة الجنسية خارج إطار الزواج                                | <input type="radio"/> | <input type="radio"/> |

\* هل تمنع وجود أحد أفراد الأسرة أثناء سؤال الطبيب/المتدرب عن التالي؟

|                                                                 | أمانع                 | لا أمانع              |
|-----------------------------------------------------------------|-----------------------|-----------------------|
| المهنة                                                          | <input type="radio"/> | <input type="radio"/> |
| الدخل                                                           | <input type="radio"/> | <input type="radio"/> |
| الحالة الاجتماعية\الزوجية (مثلا متزوج/<br>ة، مطلق/ة، إلى آخره.) | <input type="radio"/> | <input type="radio"/> |
| السكن (إيجار، مُلك، إلى آخره.)                                  | <input type="radio"/> | <input type="radio"/> |
| اقتناء الحيوانات الأليفة / تربية الحيوانات                      | <input type="radio"/> | <input type="radio"/> |
| السفر                                                           | <input type="radio"/> | <input type="radio"/> |
| التدخين                                                         | <input type="radio"/> | <input type="radio"/> |
| شرب الكحول                                                      | <input type="radio"/> | <input type="radio"/> |
| تعاطي المخدرات                                                  | <input type="radio"/> | <input type="radio"/> |
| العلاقة الجنسية خارج إطار الزواج                                | <input type="radio"/> | <input type="radio"/> |

\* قد يحتاج الطبيب أن يسأل عن الحالة الإجتماعية مثل الوظيفة ومستوى الدخل والزواج لأسباب متعددة من ضمنها بناء علاقة صحية مع المريض، ولأهمية معرفة الخلفية الاجتماعية للمريض عند شرح المرض ومناقشة الخطط العلاجية وغيرها. في حالة قيام الطبيب بشرح أهمية أخذ تاريخ الحالة الاجتماعية؛ هل سيغير ذلك في إجابتك على الأسئلة التالية؟

|                                                                   | سأجيب بمصادقية        | لن أجيب بمصادقية      | سأمتنع عن الاجابة     |
|-------------------------------------------------------------------|-----------------------|-----------------------|-----------------------|
| المهنة                                                            | <input type="radio"/> | <input type="radio"/> | <input type="radio"/> |
| الدخل                                                             | <input type="radio"/> | <input type="radio"/> | <input type="radio"/> |
| الحالة الاجتماعية\الزوجية<br>(مثلا متزوج/ة، مطلق/ة،<br>إلى آخره.) | <input type="radio"/> | <input type="radio"/> | <input type="radio"/> |
| السكن (إيجار، مُلك، إلى<br>آخره.)                                 | <input type="radio"/> | <input type="radio"/> | <input type="radio"/> |
| اقتناء الحيوانات الأليفة / تربية<br>الحيوانات                     | <input type="radio"/> | <input type="radio"/> | <input type="radio"/> |
| السفر                                                             | <input type="radio"/> | <input type="radio"/> | <input type="radio"/> |
| التدخين                                                           | <input type="radio"/> | <input type="radio"/> | <input type="radio"/> |
| شرب الكحول                                                        | <input type="radio"/> | <input type="radio"/> | <input type="radio"/> |
| تعاطي المخدرات                                                    | <input type="radio"/> | <input type="radio"/> | <input type="radio"/> |
| العلاقة الجنسية خارج إطار<br>الزواج                               | <input type="radio"/> | <input type="radio"/> | <input type="radio"/> |

\* قد ترتبط بعض العادات الاجتماعية ارتباطاً قوياً ببعض الأمراض ويتم السؤال عنها بشكل روتيني مثل التدخين، السفر إلى المناطق الموبوءة وغيره. إذا تم إيضاح أن السؤال عن هذه العادات هي إجراء روتيني من الطبيب لجميع المرضى بغض النظر عن حالة المريض الحالية أو شكواه الحالية؛ هل سيغير ذلك من إجابتك على الأسئلة التالية؟

|                                                                 | سيفير من إجابتي       | لن يغير من إجابتي     |
|-----------------------------------------------------------------|-----------------------|-----------------------|
| المهنة                                                          | <input type="radio"/> | <input type="radio"/> |
| الدخل                                                           | <input type="radio"/> | <input type="radio"/> |
| الحالة الاجتماعية\الزوجية (مثلا متزوج/<br>ة، مطلق/ة، إلى آخره.) | <input type="radio"/> | <input type="radio"/> |
| السكن (إيجار، مُلك، إلى آخره.)                                  | <input type="radio"/> | <input type="radio"/> |
| اقتناء الحيوانات الأليفة / تربية الحيوانات                      | <input type="radio"/> | <input type="radio"/> |
| السفر                                                           | <input type="radio"/> | <input type="radio"/> |
| التدخين                                                         | <input type="radio"/> | <input type="radio"/> |
| شرب الكحول                                                      | <input type="radio"/> | <input type="radio"/> |
| تعاطي المخدرات                                                  | <input type="radio"/> | <input type="radio"/> |
| العلاقة الجنسية خارج إطار الزواج                                | <input type="radio"/> | <input type="radio"/> |



\* في حال سُئلت عن التالي، هل ستوافق على تدوين جوابك في سجلك المرضي؟

نعم، أوافق على تدوين جوابي في ملفي  
الطبي

لا، أفضل أن يبقى الجواب لفظياً ولا  
يسجل في ملفي الطبي

المهنة

الدخل

الحالة الاجتماعية\الزوجية (مثلاً متزوج/  
ة، مطلق/ة، إلى آخره.)

السكن (إيجار، مُلك، إلى آخره.)

اقتناء الحيوانات الأليفة / تربية الحيوانات

السفر

التدخين

شرب الكحول

تعاطي المخدرات

العلاقة الجنسية خارج إطار الزواج

\* في حال تم إعطائك نموذج ورقي يشمل أسئلة التاريخ الاجتماعي المذكورة أعلاه، هل سيكون من الأسهل الإجابة عليها مقارنة بالإجابة عنها أثناء مقابلة الطبيب (وجهًا لوجه)؟

نعم

لا

\* عند أخذ تاريخك الاجتماعي من قبل طالب، متدرب، أخصائي إجتماعي، أو الطبيب المسؤول عن حالتك، هل ستختلف إجابتك باختلاف الشخص الذي يجمع التاريخ المرضي؟

سأجيب بمصادقية

لن أجيب بمصادقية

سأمتنع عن الإجابة

طالب متدرب

طبيب متدرب

أخصائي اجتماعي (غير  
طبيب)

الاستشاري المعالج

هل يؤثر جنس الطبيب على إجابتك على أسئلة التاريخ الاجتماعي (طبيبة تسأل مريض او طبيب يسأل مريضة)؟

|                                                                 | يؤثر                  | لا يؤثر               |
|-----------------------------------------------------------------|-----------------------|-----------------------|
| المهنة                                                          | <input type="radio"/> | <input type="radio"/> |
| الدخل                                                           | <input type="radio"/> | <input type="radio"/> |
| الحالة الاجتماعية\الزوجية (مثلا متزوج/<br>ة، مطلق/ة، إلى آخره.) | <input type="radio"/> | <input type="radio"/> |
| السكن (إيجار، مُلك، إلى آخره.)                                  | <input type="radio"/> | <input type="radio"/> |
| اقتناء الحيوانات الأليفة / تربية الحيوانات                      | <input type="radio"/> | <input type="radio"/> |
| السفر                                                           | <input type="radio"/> | <input type="radio"/> |
| التدخين                                                         | <input type="radio"/> | <input type="radio"/> |
| شرب الكحول                                                      | <input type="radio"/> | <input type="radio"/> |
| تعاطي المخدرات                                                  | <input type="radio"/> | <input type="radio"/> |
| العلاقة الجنسية خارج اطار الزواج                                | <input type="radio"/> | <input type="radio"/> |

\*

هل يؤثر مكان أخذ التاريخ المرضي على إجابتك على أسئلة التاريخ الاجتماعي (العمل، الدخل، الزواج، السكن، السفر)؟

نعم

لا

غرفة خاصة / العيادة

غرفة مستشفى / متعددة الأسرة

في الطوارئ

بوجود التمريض أو شخص آخر

في وجود أحد أفراد العائلة

\*

هل يؤثر مكان أخذ التاريخ المرضي على إجابتك على أسئلة العادات التالية: التدخين، تعاطي المخدرات، شرب الكحول؟

نعم

لا

العيادة/ غرفة تنويم خاصة

غرفة تنويم متعددة الأسرّة بالمستشفى

في الطوارئ

بوجود التمريض أو ممارس صحي آخر

## **Supplement 3**

Table S1. Did you feel that you have to answer faithfully?

| Characteristics, No. (%) |     | Total      | Age, yrs    |             | P value    | Sex         |             | P value    | Graduate or higher |             | P value |
|--------------------------|-----|------------|-------------|-------------|------------|-------------|-------------|------------|--------------------|-------------|---------|
|                          |     |            | <40         | ≥40         |            | Man         | Woman       |            | No                 | Yes         |         |
|                          |     |            |             | n=510       | 284 (55.7) | 226 (44.3)  | 131 (25.7)  | 379 (74.3) | 120 (23.5)         | 390 (76.5)  |         |
| Your job                 |     |            |             |             |            |             |             |            |                    |             |         |
|                          | No  | 102 (20)   | 76 (74.51)  | 26 (25.49)  | <0.001     | 22 (21.57)  | 80 (78.43)  | 0.31       | 25 (24.51)         | 77 (75.49)  | 0.79    |
|                          | Yes | 408 (80)   | 208 (50.98) | 200 (49.02) |            | 109 (26.72) | 299 (73.28) |            | 95 (23.28)         | 313 (76.72) |         |
| Your income              |     |            |             |             |            |             |             |            |                    |             |         |
|                          | No  | 279 (54.7) | 167 (59.86) | 112 (40.14) | 0.04       | 68 (24.37)  | 211 (75.63) | 0.47       | 66 (23.66)         | 213 (76.34) | 1       |
|                          | Yes | 231 (45.3) | 117 (50.65) | 114 (49.35) |            | 63 (27.27)  | 168 (72.73) |            | 54 (23.38)         | 177 (76.62) |         |
| Your marital status      |     |            |             |             |            |             |             |            |                    |             |         |
|                          | No  | 35 (6.9)   | 22 (62.86)  | 13 (37.14)  | 0.48       | 11 (31.43)  | 24 (68.57)  | 0.42       | 13 (37.14)         | 22 (62.86)  | 0.06    |
|                          | Yes | 475 (93.1) | 262 (55.16) | 213 (44.84) |            | 120 (25.26) | 355 (74.74) |            | 107 (22.53)        | 368 (77.47) |         |
| Your housing condition   |     |            |             |             |            |             |             |            |                    |             |         |
|                          | No  | 214 (42)   | 141 (65.89) | 73 (34.11)  | <0.001     | 53 (24.77)  | 161 (75.23) | 0.75       | 50 (23.36)         | 164 (76.64) | 1       |
|                          | Yes | 296 (58)   | 143 (48.31) | 153 (51.69) |            | 78 (26.35)  | 218 (73.65) |            | 70 (23.65)         | 226 (76.35) |         |
| Animal contact           |     |            |             |             |            |             |             |            |                    |             |         |
|                          | No  | 59 (11.6)  | 27 (45.76)  | 32 (54.24)  | 0.12       | 17 (28.81)  | 42 (71.19)  | 0.53       | 18 (30.51)         | 41 (69.49)  | 0.19    |
|                          | Yes | 451 (88.4) | 257 (56.98) | 194 (43.02) |            | 114 (25.28) | 337 (74.72) |            | 102 (22.62)        | 349 (77.38) |         |
| Your travel              |     |            |             |             |            |             |             |            |                    |             |         |
|                          | No  | 107 (21)   | 60 (56.07)  | 47 (43.93)  | 1          | 22 (20.56)  | 85 (79.44)  | 0.21       | 28 (26.17)         | 79 (73.83)  | 0.52    |
|                          | Yes | 403 (79)   | 224 (55.58) | 179 (44.42) |            | 109 (27.05) | 294 (72.95) |            | 92 (22.83)         | 311 (77.17) |         |
| Smoking                  |     |            |             |             |            |             |             |            |                    |             |         |
|                          | No  | 45 (8.8)   | 24 (53.33)  | 21 (46.67)  | 0.75       | 8 (17.78)   | 37 (82.22)  | 0.28       | 11 (24.44)         | 34 (75.56)  | 0.85    |
|                          | Yes | 465 (91.2) | 260 (55.91) | 205 (44.09) |            | 123 (26.45) | 342 (73.55) |            | 109 (23.44)        | 356 (76.56) |         |
| Alcohol                  |     |            |             |             |            |             |             |            |                    |             |         |
|                          | No  | 64 (12.5)  | 30 (46.88)  | 34 (53.12)  | 0.14       | 14 (21.88)  | 50 (78.12)  | 0.54       | 12 (18.75)         | 52 (81.25)  | 0.43    |

|                    |     |            |             |             |      |             |             |      |             |             |      |
|--------------------|-----|------------|-------------|-------------|------|-------------|-------------|------|-------------|-------------|------|
|                    | Yes | 446 (87.5) | 254 (56.95) | 192 (43.05) |      | 117 (26.23) | 329 (73.77) |      | 108 (24.22) | 338 (75.78) |      |
| Illicit drugs      |     |            |             |             |      |             |             |      |             |             |      |
|                    | No  | 67 (13.1)  | 32 (47.76)  | 35 (52.24)  | 0.18 | 16 (23.88)  | 51 (76.12)  | 0.76 | 11 (16.42)  | 56 (83.58)  | 0.16 |
|                    | Yes | 443 (86.9) | 252 (56.88) | 191 (43.12) |      | 115 (25.96) | 328 (74.04) |      | 109 (24.60) | 334 (75.40) |      |
| Your sexual habits |     |            |             |             |      |             |             |      |             |             |      |
|                    | No  | 103 (20.2) | 52 (50.49)  | 51 (49.51)  | 0.26 | 24 (23.30)  | 79 (76.70)  | 0.61 | 23 (22.33)  | 80 (77.67)  | 0.76 |
|                    | Yes | 407 (89.8) | 232 (57.00) | 175 (43.00) |      | 107 (26.29) | 300 (73.71) |      | 97 (23.83)  | 310 (76.17) |      |

**Notes:** Those who older than 40 years are less likely to answer faithfully about jobs, income, and housing condition questions ( $P < 0.05$ ).



Table S2. Do you mind if any family member is present during medical interview and being asked about.....?

| Characteristics, No. (%)      |          | Total      | Age, yrs   |            | P value | Sex        |            | P value | Graduate or higher |            | P value |
|-------------------------------|----------|------------|------------|------------|---------|------------|------------|---------|--------------------|------------|---------|
|                               |          |            | <40        | ≥40        |         | Man        | Woman      |         | No                 | Yes        |         |
|                               |          |            | n=510      | 284 (55.7) |         | 226 (44.3) | 131 (25.7) |         | 379 (74.3)         | 120 (23.5) |         |
| <b>Your job</b>               |          |            |            |            |         |            |            |         |                    |            |         |
|                               | Agree    | 453 (88.8) | 246(54.30) | 207(45.70) | 0.09    | 119(26.27) | 334(73.73) | 0.52    | 105(23.18)         | 348(76.82) | 0.62    |
|                               | Disagree | 57 (11.2)  | 38(66.67)  | 19(33.33)  |         | 12(21.05)  | 45(78.95)  |         | 15(26.32)          | 42(73.68)  |         |
| <b>Your income</b>            |          |            |            |            |         |            |            |         |                    |            |         |
|                               | Agree    | 368 (72.2) | 198(53.80) | 170(46.20) | 0.19    | 86(23.37)  | 282(76.63) | 0.056   | 94(25.54)          | 274(74.46) | 0.1     |
|                               | Disagree | 142 (27.8) | 86(60.56)  | 56(39.44)  |         | 45(31.69)  | 97(68.31)  |         | 26(18.31)          | 116(81.69) |         |
| <b>Your marital status</b>    |          |            |            |            |         |            |            |         |                    |            |         |
|                               | Agree    | 455 (89.2) | 251(55.16) | 204(44.84) | 0.56    | 118(25.93) | 337(74.07) | 0.87    | 102(22.42)         | 353(77.58) | 0.09    |
|                               | Disagree | 55 (10.8)  | 33(60)     | 22(40)     |         | 13(23.64)  | 42(76.36)  |         | 18(32.73)          | 37(67.27)  |         |
| <b>Your housing condition</b> |          |            |            |            |         |            |            |         |                    |            |         |
|                               | Agree    | 452 (88.6) | 247(54.65) | 205(45.35) | 0.2     | 120(26.55) | 332(73.45) | 0.26    | 108(23.89)         | 344(76.11) | 0.74    |
|                               | Disagree | 58 (11.4)  | 37(63.79)  | 21(36.21)  |         | 11(18.97)  | 47(81.03)  |         | 12(20.69)          | 46(79.31)  |         |
| <b>Animal contact</b>         |          |            |            |            |         |            |            |         |                    |            |         |
|                               | Agree    | 467 (91.6) | 255(54.60) | 212(45.40) | 0.11    | 123(26.34) | 344(73.66) | 0.36    | 108(23.13)         | 359(76.87) | 0.45    |
|                               | Disagree | 43 (8.4)   | 29(67.44)  | 14(32.56)  |         | 8(18.60)   | 35(81.40)  |         | 12(27.91)          | 31(72.09)  |         |
| <b>Your travel</b>            |          |            |            |            |         |            |            |         |                    |            |         |
|                               | Agree    | 429 (84.1) | 229(53.38) | 200(46.62) | 0.02    | 105(24.48) | 324(75.52) | 0.16    | 102(23.78)         | 327(76.22) | 0.88    |
|                               | Disagree | 81 (15.9)  | 55(67.90)  | 26(32.10)  |         | 26(32.10)  | 55(67.90)  |         | 18(22.22)          | 63(77.78)  |         |
| <b>Smoking</b>                |          |            |            |            |         |            |            |         |                    |            |         |
|                               | Agree    | 333 (65.3) | 166(49.85) | 167(50.15) | <0.001  | 76(22.82)  | 257(77.18) | 0.04    | 84(25.23)          | 249(74.77) | 0.22    |
|                               | Disagree | 177 (34.7) | 118(66.67) | 59(33.33)  |         | 55(31.07)  | 122(68.93) |         | 36(20.34)          | 141(79.66) |         |
| <b>Alcohol</b>                |          |            |            |            |         |            |            |         |                    |            |         |
|                               | Agree    | 318 (62.4) | 164(51.57) | 154(48.43) | 0.01    | 76(23.90)  | 242(76.10) | 0.25    | 81(25.47)          | 237(74.53) | 0.19    |

|                           |          |            |            |            |       |           |            |      |           |            |      |
|---------------------------|----------|------------|------------|------------|-------|-----------|------------|------|-----------|------------|------|
|                           | Disagree | 192 (37.6) | 120(62.50) | 72(37.50)  |       | 55(28.65) | 137(71.35) |      | 39(20.31) | 153(79.69) |      |
| <b>Illicit drugs</b>      |          |            |            |            |       |           |            |      |           |            |      |
|                           | Agree    | 314 (61.6) | 162(51.59) | 152(48.41) | 0.02  | 75(23.89) | 239(76.11) | 0.25 | 78(24.84) | 236(75.16) | 0.39 |
|                           | Disagree | 196 (38.4) | 122(62.24) | 74(37.76)  |       | 56(28.57) | 140(71.43) |      | 42(21.43) | 154(78.57) |      |
| <b>Your sexual habits</b> |          |            |            |            |       |           |            |      |           |            |      |
|                           | Agree    | 281 (55.1) | 141(50.18) | 140(49.82) | 0.007 | 86(24.20) | 213(75.80) | 0.41 | 74(26.33) | 207(73.67) | 0.11 |
|                           | Disagree | 229 (44.9) | 143(62.45) | 86(37.55)  |       | 63(27.51) | 166(72.49) |      | 46(20.09) | 183(79.91) |      |

**Notes:** Those who older than 40 years minds if any family member is present during medical interview and being asked about travel, sexual habit, illicit drug abuse, or alcohol ( $P < 0.05$ ). Also, women are minded to answer smoking questions if any family member were present.

Table S3. If the physician explained to you the importance of the social enquiry about ..., would that change your attitude/answer?

| Characteristics, No. (%)      |     | Total      | Age, yrs    |             | P value | Sex         |             | P value | Graduate or higher |             | P value |
|-------------------------------|-----|------------|-------------|-------------|---------|-------------|-------------|---------|--------------------|-------------|---------|
|                               |     |            | <40         | ≥40         |         | Man         | Woman       |         | No                 | Yes         |         |
|                               |     |            | n=510       | 284 (55.7)  |         | 226 (44.3)  | 131 (25.7)  |         | 379 (74.3)         | 120 (23.5)  |         |
| <b>Your job</b>               |     |            |             |             |         |             |             |         |                    |             |         |
|                               | No  | 44 (8.6)   | 25 (8.80)   | 19 (8.41)   | 1       | 13 (9.92)   | 31 (8.18)   | 0.58    | 11 (9.17)          | 33 (8.46)   | 0.85    |
|                               | Yes | 466 (91.4) | 259 (91.20) | 207 (91.59) |         | 118 (90.08) | 348 (91.82) |         | 109 (90.83)        | 357 (91.54) |         |
| <b>Your income</b>            |     |            |             |             |         |             |             |         |                    |             |         |
|                               | No  | 174 (34.1) | 94 (33.10)  | 80 (35.40)  | 0.63    | 46 (35.11)  | 128 (33.77) | 0.83    | 39 (32.50)         | 135 (34.62) | 0.74    |
|                               | Yes | 336 (65.9) | 190 (66.90) | 146 (64.60) |         | 85 (64.89)  | 251 (66.23) |         | 81 (67.50)         | 255 (65.38) |         |
| <b>Your marital status</b>    |     |            |             |             |         |             |             |         |                    |             |         |
|                               | No  | 23 (4.5)   | 10 (3.52)   | 13 (5.75)   | 0.28    | 5 (3.82)    | 18 (4.75)   | 0.8     | 8 (6.67)           | 15 (3.85)   | 0.21    |
|                               | Yes | 487 (95.5) | 274 (96.48) | 213 (94.25) |         | 126 (96.18) | 361 (95.25) |         | 112 (93.33)        | 375 (96.15) |         |
| <b>Your housing condition</b> |     |            |             |             |         |             |             |         |                    |             |         |
|                               | No  | 81 (15.9)  | 48 (16.90)  | 33 (14.60)  | 0.54    | 20 (15.27)  | 61 (16.09)  | 0.89    | 20 (16.67)         | 61 (15.64)  | 0.77    |
|                               | Yes | 429 (84.1) | 236 (83.10) | 193 (85.40) |         | 111 (84.73) | 318 (83.91) |         | 100 (83.33)        | 329 (84.36) |         |
| <b>Animal contact</b>         |     |            |             |             |         |             |             |         |                    |             |         |
|                               | No  | 20 (3.9)   | 8 (2.82)    | 12 (5.31)   | 0.17    | 4 (3.05)    | 16 (4.22)   | 0.79    | 7 (5.83)           | 13 (3.33)   | 0.27    |
|                               | Yes | 490 (96.1) | 276 (97.18) | 214 (94.69) |         | 127 (96.95) | 363 (95.78) |         | 113 (94.17)        | 377 (96.67) |         |
| <b>Your travel</b>            |     |            |             |             |         |             |             |         |                    |             |         |
|                               | No  | 46 (9)     | 22 (7.75)   | 24 (10.62)  | 0.27    | 14 (10.69)  | 32 (8.44)   | 0.47    | 12 (10)            | 34 (8.72)   | 0.71    |
|                               | Yes | 464 (91)   | 262 (92.25) | 202 (89.38) |         | 117 (89.31) | 347 (91.56) |         | 108 (90)           | 356 (91.28) |         |
| <b>Smoking</b>                |     |            |             |             |         |             |             |         |                    |             |         |
|                               | No  | 40 (7.8)   | 16 (5.63)   | 24 (10.62)  | 0.04    | 9 (6.87)    | 31 (8.18)   | 0.71    | 13 (10.83)         | 27 (6.92)   | 0.17    |
|                               | Yes | 470 (92.2) | 268 (94.37) | 202 (89.38) |         | 122 (93.13) | 348 (91.82) |         | 107 (89.17)        | 363 (93.08) |         |
| <b>Alcohol</b>                |     |            |             |             |         |             |             |         |                    |             |         |
|                               | No  | 55 (10.8)  | 23 (8.10)   | 32 (14.16)  | 0.03    | 15 (11.45)  | 40 (10.55)  | 0.74    | 18 (15)            | 37 (9.49)   | 0.09    |

|                           |     |            |             |             |      |             |             |      |             |             |      |
|---------------------------|-----|------------|-------------|-------------|------|-------------|-------------|------|-------------|-------------|------|
|                           | Yes | 455 (89.2) | 261 (91.90) | 194 (85.84) |      | 116 (88.55) | 339 (89.45) |      | 102 (85)    | 353 (90.51) |      |
| <b>Illicit drugs</b>      |     |            |             |             |      |             |             |      |             |             |      |
|                           | No  | 59 (11.9)  | 24 (8.45)   | 35 (15.49)  | 0.01 | 16 (12.21)  | 43 (11.35)  | 0.75 | 19 (15.83)  | 40 (10.26)  | 0.1  |
|                           | Yes | 451 (88.4) | 260 (91.55) | 191 (84.51) |      | 115 (87.79) | 336 (88.65) |      | 101 (84.17) | 350 (89.74) |      |
| <b>Your sexual habits</b> |     |            |             |             |      |             |             |      |             |             |      |
|                           | No  | 80 (15.7)  | 38 (13.38)  | 42 (18.58)  | 0.11 | 19 (14.50)  | 61 (16.09)  | 0.78 | 23 (19.17)  | 57 (14.62)  | 0.25 |
|                           | Yes | 430 (84.3) | 246 (86.62) | 184 (81.42) |      | 112 (85.50) | 318 (83.91) |      | 97 (80.83)  | 333 (85.38) |      |

**Notes:** Those who older than 40 years are less likely to change their attitude or answer if the physician explained to him the importance of social history, especially about illicit drug abuse and smoking ( $P < 0.05$ ).

|  |  |  |  |  |  |  |  |  |  |  |  |
|--|--|--|--|--|--|--|--|--|--|--|--|
|  |  |  |  |  |  |  |  |  |  |  |  |
|--|--|--|--|--|--|--|--|--|--|--|--|

**Table S4. Would you agree that your answers be documented in your medical records?**

| Characteristics, No. (%)      | Total | Age, yrs   |            | P value    | Sex        |            | P value    | Graduate or higher |            | P value    |            |
|-------------------------------|-------|------------|------------|------------|------------|------------|------------|--------------------|------------|------------|------------|
|                               |       | <40        | ≥40        |            | Man        | Woman      |            | No                 | Yes        |            |            |
|                               |       | n=510      | 284 (55.7) |            | 226 (44.3) | 131 (25.7) |            | 379 (74.3)         | 120 (23.5) |            | 390 (76.5) |
| <b>Your job</b>               |       |            |            |            |            |            |            |                    |            |            |            |
|                               | No    | 85 (16.7)  | 57(20.07)  | 28(12.39)  | 0.02       | 24(18.32)  | 61(16.09)  | 0.58               | 19(15.83)  | 66(16.92)  | 0.88       |
|                               | Yes   | 425 (83.3) | 227(79.93) | 198(87.61) |            | 107(81.68) | 318(83.91) |                    | 101(84.17) | 324(83.08) |            |
| <b>Your income</b>            |       |            |            |            |            |            |            |                    |            |            |            |
|                               | No    | 227 (44.5) | 138(48.59) | 89(39.38)  | 0.04       | 59(45.04)  | 168(44.33) | 0.91               | 48(40)     | 179(45.90) | 0.29       |
|                               | Yes   | 283 (55.5) | 146(51.41) | 137(60.62) |            | 72(54.96)  | 211(55.67) |                    | 72(60)     | 211(54.10) |            |
| <b>Your marital status</b>    |       |            |            |            |            |            |            |                    |            |            |            |
|                               | No    | 61 (12)    | 40(14.80)  | 21(9.29)   | 0.1        | 19(14.50)  | 42(11.08)  | 0.34               | 17(14.17)  | 44(11.28)  | 0.42       |
|                               | Yes   | 449 (88)   | 244(85.92) | 205(90.71) |            | 112(85.50) | 337(88.92) |                    | 103(85.83) | 346(88.79) |            |
| <b>Your housing condition</b> |       |            |            |            |            |            |            |                    |            |            |            |
|                               | No    | 144 (28.2) | 103(36.27) | 41(18.14)  | <0.001     | 34(25.95)  | 110(29.02) | 0.57               | 34(28.33)  | 110(28.21) | 1          |
|                               | Yes   | 366 (71.8) | 181(63.73) | 185(81.86) |            | 97(74.05)  | 269(70.98) |                    | 86(71.67)  | 280(71.79) |            |

|                                         |     |            |            |            |       |            |            |      |            |            |      |
|-----------------------------------------|-----|------------|------------|------------|-------|------------|------------|------|------------|------------|------|
| <b>Whether you have pets at home</b>    |     |            |            |            |       |            |            |      |            |            |      |
|                                         | No  | 80 (15.7)  | 50(17.61)  | 30(13.27)  | 0.22  | 24(18.32)  | 56(14.78)  | 0.33 | 20(16.67)  | 60(15.38)  | 0.77 |
|                                         | Yes | 430 (84.3) | 234(82.39) | 196(86.73) |       | 107(81.68) | 323(85.22) |      | 100(83.33) | 330(84.62) |      |
| <b>Whether you are living on a farm</b> |     |            |            |            |       |            |            |      |            |            |      |
|                                         | No  | 88 (17.3)  | 57(20.07)  | 31(13.72)  | 0.06  | 23(17.56)  | 65(17.15)  | 0.89 | 26(21.67)  | 62(15.90)  | 0.16 |
|                                         | Yes | 422 (82.7) | 227(79.93) | 195(86.28) |       | 108(82.44) | 314(82.85) |      | 94(78.33)  | 328(84.10) |      |
| <b>Your travel</b>                      |     |            |            |            |       |            |            |      |            |            |      |
|                                         | No  | 107 (21)   | 64(22.54)  | 43(19.03)  | 0.38  | 32(24.43)  | 75(19.79)  | 0.26 | 25(20.83)  | 82(21.03)  | 1    |
|                                         | Yes | 403 (79)   | 220(77.46) | 183(80.97) |       | 99(75.57)  | 304(80.21) |      | 95(79.19)  | 108(78-97) |      |
| <b>Smoking</b>                          |     |            |            |            |       |            |            |      |            |            |      |
|                                         | No  | 146 (28.6) | 93(32.75)  | 53(23.45)  | 0.02  | 40(30.53)  | 106(27.97) | 0.57 | 29(24.17)  | 117(30)    | 0.24 |
|                                         | Yes | 364 (71.4) | 191(67.25) | 173(76.55) |       | 91(69.47)  | 273(72.03) |      | 91(75.83)  | 273(70)    |      |
| <b>Alcohol</b>                          |     |            |            |            |       |            |            |      |            |            |      |
|                                         | No  | 185 (36.3) | 117(41.20) | 68(30.09)  | 0.01  | 49(37.40)  | 136(35.88) | 0.75 | 40(33.33)  | 145(37.18) | 0.51 |
|                                         | Yes | 325 (63.7) | 167(58.80) | 158(69.91) |       | 82(62.60)  | 243(64.12) |      | 80(66.67)  | 245(62.82) |      |
| <b>Illicit drugs</b>                    |     |            |            |            |       |            |            |      |            |            |      |
|                                         | No  | 192 (37.6) | 122(42.96) | 70(30.97)  | 0.006 | 49(37.40)  | 143(37.73) | 1    | 41(34.17)  | 151(38.72) | 0.39 |
|                                         | Yes | 318 (62.4) | 162(57.04) | 156(69.03) |       | 82(62.60)  | 236(62.27) |      | 79(65.83)  | 239(61.28) |      |
| <b>Your sexual habits</b>               |     |            |            |            |       |            |            |      |            |            |      |
|                                         | No  | 217 (42.5) | 135(47.54) | 82(36.28)  | 0.01  | 57(43.51)  | 160(42.22) | 0.83 | 47(39.17)  | 170(43.59) | 0.4  |
|                                         | Yes | 293 (57.5) | 149(52.46) | 144(63.72) |       | 74(56.49)  | 219(57.78) |      | 73(60.83)  | 220(56.41) |      |

**Notes:** Those who younger than 40 years old were more sensitive to documentation of any component of social history in their file, especially about job, housing condition, smoking, alcohol, illicit drug abuse or sexual habits. There was no significant difference with regard to sex or education level.

| Table S5. Would your answer be different if the interviewer was ...? |                          |            |            |            |         |            |            |         |                    |            |         |
|----------------------------------------------------------------------|--------------------------|------------|------------|------------|---------|------------|------------|---------|--------------------|------------|---------|
| Characteristics, No. (%)                                             |                          | Total      | Age, yrs   |            | P value | Sex        |            | P value | Graduate or higher |            | P value |
|                                                                      |                          |            | <40        | ≥40        |         | Man        | Woman      |         | No                 | Yes        |         |
|                                                                      |                          |            | n=510      | 284 (55.7) |         | 226 (44.3) | 131 (25.7) |         | 379 (74.3)         | 120 (23.5) |         |
| <b>Student, No. (%)</b>                                              |                          |            |            |            |         |            |            |         |                    |            |         |
|                                                                      | Will decline to answer   | 51 (10)    | 30(10.56)  | 21(9.29)   | 0.91    | 16(12.21)  | 35(9.23)   | 0.28    | 9(7.50)            | 42(10.77)  | 0.54    |
|                                                                      | Will not answer honestly | 57 (11.2)  | 32(11.27)  | 25(11.06)  |         | 18(13.74)  | 39(10.29)  |         | 15(12.50)          | 42(10.77)  |         |
|                                                                      | Will answer honestly     | 402 (78.8) | 222(78.17) | 180(79.65) |         | 97(74.05)  | 305(80.47) |         | 96(80)             | 106(78.46) |         |
| <b>Resident, No. (%)</b>                                             |                          |            |            |            |         |            |            |         |                    |            |         |
|                                                                      | Will decline to answer   | 35 (6.9)   | 21(7.39)   | 14(6.19)   | 0.45    | 11(8.48)   | 24(6.33)   | 0.57    | 6 (5)              | 29(7.44)   | 0.33    |
|                                                                      | Will not answer honestly | 56 (11)    | 35(12.32)  | 21(9.29)   |         | 16(12.21)  | 40(10.55)  |         | 17(14.17)          | 39(10)     |         |
|                                                                      | Will answer honestly     | 419 (82.2) | 228(80.28) | 191(84.51) |         | 104(79.39) | 315(83.11) |         | 97(80.83)          | 322(82.56) |         |
| <b>Not a doctor, No. (%)</b>                                         |                          |            |            |            |         |            |            |         |                    |            |         |
|                                                                      | Will decline to answer   | 32 (6.3)   | 21(7.39)   | 11(4.87)   | 0.46    | 10 (7.63)  | 22(5.80)   | 0.75    | 4(3.33)            | 28(7.18)   | 0.15    |
|                                                                      | Will not answer honestly | 44 (8.6)   | 23(8.10)   | 21(9.29)   |         | 11(8.40)   | 33(8.71)   |         | 14(11.67)          | 30(7.69)   |         |
|                                                                      | Will answer honestly     | 434 (85.1) | 240(84.51) | 194(85.84) |         | 110(83.97) | 324(85.49) |         | 102(85)            | 332(85.13) |         |
| <b>Consultant, No. (%)</b>                                           |                          |            |            |            |         |            |            |         |                    |            |         |
|                                                                      | Will decline to answer   | 6 (1.2)    | 1 (1.76)   | 1 (0.44)   | 0.27    | 1 (0.76)   | 5(1.32)    | 1       | 2 (1.67)           | 4(1.03)    | 0.55    |
|                                                                      | Will not answer honestly | 9 (1.8)    | 4(4.41)    | 5(2.21)    |         | 2(1.53)    | 7(1.85)    |         | 3(2.5)             | 6(1.54)    |         |
|                                                                      | Will answer honestly     | 495 (97.1) | 275(96.83) | 220(97.35) |         | 128(97.71) | 367(96.83) |         | 115(95.83)         | 380(97.44) |         |

Table S6. Would the doctor sex affect your answers?

| Characteristics, No. (%)                         |     | Total      | Age, yrs   |            | P value | Sex        |            | P value | Graduate or higher |            | P value |
|--------------------------------------------------|-----|------------|------------|------------|---------|------------|------------|---------|--------------------|------------|---------|
|                                                  |     |            | <40        | ≥40        |         | Man        | Woman      |         | No                 | Yes        |         |
|                                                  |     |            | n=508      | 282 (55.5) |         | 226 (44.5) | 131 (25.8) |         | 377 (74.2)         | 119 (23.4) |         |
| <b>Your job<sup>a</sup></b>                      |     |            |            |            |         |            |            |         |                    |            |         |
|                                                  | No  | 457 (90.1) | 254(90.39) | 203(89.82) | 0.88    | 121(92.37) | 336(89.36) | 0.39    | 100(84.75)         | 357(91.77) | 0.03    |
|                                                  | Yes | 50 (9.9)   | 27(9.61)   | 23(10.18)  |         | 10(7.63)   | 40(10.64)  |         | 18(15.25)          | 32(8.23)   |         |
| <b>Your income<sup>b</sup></b>                   |     |            |            |            |         |            |            |         |                    |            |         |
|                                                  | No  | 447 (88.3) | 253(90.04) | 194(86.22) | 0.21    | 120(91.60) | 327(87.20) | 0.2     | 99(83.19)          | 348(89.92) | 0.05    |
|                                                  | Yes | 59 (11.7)  | 28(9.96)   | 31(13.78)  |         | 11(8.40)   | 48(12.80)  |         | 10(16.81)          | 39(10.08)  |         |
| <b>Your marital status</b>                       |     |            |            |            |         |            |            |         |                    |            |         |
|                                                  | No  | 448 (88.2) | 251(89.01) | 197(87.17) | 0.58    | 116(88.55) | 332(88.06) | 1       | 99(83.19)          | 349(89.72) | 0.07    |
|                                                  | Yes | 60 (11.8)  | 31(10.99)  | 29(12.83)  |         | 15(11.45)  | 45(11.94)  |         | 20(16.81)          | 40(10.28)  |         |
| <b>Your housing condition<sup>a</sup></b>        |     |            |            |            |         |            |            |         |                    |            |         |
|                                                  | No  | 451 (89)   | 253(90.04) | 198(87.61) | 0.39    | 120(91.60) | 331(88.03) | 0.33    | 102(85.71)         | 349(89.95) | 0.24    |
|                                                  | Yes | 56 (11)    | 28(9.96)   | 28(12.39)  |         | 11(8.40)   | 45(11.97)  |         | 17(14.29)          | 39(10.05)  |         |
| <b>Whether you have pets at home<sup>b</sup></b> |     |            |            |            |         |            |            |         |                    |            |         |
|                                                  | No  | 456 (90.1) | 255(90.75) | 201(89.33) | 0.65    | 120(92.31) | 336(89.36) | 0.39    | 97(82.91)          | 359(92.29) | 0.005   |
|                                                  | Yes | 50 (9.9)   | 26(9.25)   | 24(10.67)  |         | 10(7.69)   | 40(10.64)  |         | 20(17.09)          | 30(7.71)   |         |
| <b>Your travel<sup>b</sup></b>                   |     |            |            |            |         |            |            |         |                    |            |         |
|                                                  | No  | 454 (89.7) | 256(91.10) | 198(88)    | 0.3     | 118(90.08) | 336(89.60) | 1       | 97(82.91)          | 357(91.77) | 0.009   |
|                                                  | Yes | 52 (10.3)  | 25(8.90)   | 27(12)     |         | 13(9.92)   | 39(10.40)  |         | 20(17.09)          | 32(8.23)   |         |
| <b>Smoking<sup>b</sup></b>                       |     |            |            |            |         |            |            |         |                    |            |         |
|                                                  | No  | 434 (85.8) | 246(87.54) | 188(83.56) | 0.2     | 114(87.69) | 320(85.11) | 0.56    | 92(77.97)          | 342(88.14) | 0.01    |
|                                                  | Yes | 72 (14.2)  | 35(12.46)  | 37(16.44)  |         | 16(12.31)  | 56(14.89)  |         | 26(22.03)          | 46(11.86)  |         |
| <b>Alcohol<sup>b</sup></b>                       |     |            |            |            |         |            |            |         |                    |            |         |
|                                                  | No  | 424 (83.8) | 241(85.77) | 183(81.33) | 0.18    | 107(81.68) | 317(84.53) | 0.49    | 92(77.97)          | 332(85.57) | 0.06    |
|                                                  | Yes | 82 (16.2)  | 40(14.23)  | 42(18.67)  |         | 24(18.32)  | 58(15.47)  |         | 26(22.03)          | 56(14.43)  |         |
| <b>Illicit drugs<sup>c</sup></b>                 |     |            |            |            |         |            |            |         |                    |            |         |
|                                                  | No  | 422 (83.6) | 240(85.41) | 182(81.25) | 0.22    | 107(81.68) | 315(84.22) | 0.49    | 90(76.92)          | 332(85.57) | 0.03    |
|                                                  | Yes | 38 (16.4)  | 41(14.59)  | 42(18.75)  |         | 24(18.32)  | 59(15.78)  |         | 27(23.08)          | 56(14.43)  |         |

| Your sexual habits <sup>d</sup> |     |            |            |            |      |            |            |      |           |            |      |
|---------------------------------|-----|------------|------------|------------|------|------------|------------|------|-----------|------------|------|
|                                 | No  | 382 (75.9) | 207(73.93) | 175(78.48) | 0.24 | 100(76.92) | 282(75.60) | 0.81 | 79(68.70) | 303(78.09) | 0.04 |
|                                 | Yes | 121 (24.1) | 73(26.07)  | 48(21.52)  |      | 30(23.08)  | 91(24.40)  |      | 36(31.30) | 85(21.91)  |      |
| a—Data missed for 1 response    |     |            |            |            |      |            |            |      |           |            |      |
| b—Data missed for 2 responses   |     |            |            |            |      |            |            |      |           |            |      |
| c—Data missed for 3 responses   |     |            |            |            |      |            |            |      |           |            |      |
| d—Data missed for 4 responses   |     |            |            |            |      |            |            |      |           |            |      |

**Notes:** Those who graduate or more are sensitive to opposite sex of history collector especially about presence of pet at home, smoking, illicit drug abuse, travel and about sexual habits.



| Table S7. Would conducting the interview in ... affect your answers to questions about your job, income, marital status, housing condition, or travel? |     |            |            |            |         |            |            |         |                    |            |         |
|--------------------------------------------------------------------------------------------------------------------------------------------------------|-----|------------|------------|------------|---------|------------|------------|---------|--------------------|------------|---------|
| Characteristics, No. (%)                                                                                                                               |     | Total      | Age, yrs   |            | P value | Sex        |            | P value | Graduate or higher |            | P value |
|                                                                                                                                                        |     |            | <40        | ≥40        |         | Man        | Woman      |         | No                 | Yes        |         |
|                                                                                                                                                        |     |            | n=510      | 284 (55.7) |         | 226 (44.3) | 131 (25.7) |         | 379 (74.3)         | 120 (23.5) |         |
| <b>Private room or clinic</b>                                                                                                                          |     |            |            |            |         |            |            |         |                    |            |         |
|                                                                                                                                                        | No  | 382 (74.9) | 209(73.59) | 173(76.55) | 0.47    | 105(80.15) | 277(73.09) | 0.12    | 87(72.50)          | 295(75.64) | 0.54    |
|                                                                                                                                                        | Yes | 128 (25.1) | 75(26.41)  | 53(23.45)  |         | 26(19.85)  | 102(26.91) |         | 33(27.50)          | 95(24.36)  |         |
| <b>Multibed room</b>                                                                                                                                   |     |            |            |            |         |            |            |         |                    |            |         |
|                                                                                                                                                        | No  | 291 (57.1) | 149(52.46) | 142(62.83) | 0.02    | 73(55.73)  | 218(57.52) | 0.75    | 60(50)             | 231(59.23) | 0.09    |
|                                                                                                                                                        | Yes | 219 (42.9) | 135(47.54) | 84(37.17)  |         | 58(44.27)  | 161(42.48) |         | 60(50)             | 159(40.77) |         |
| <b>Emergency department</b>                                                                                                                            |     |            |            |            |         |            |            |         |                    |            |         |
|                                                                                                                                                        | No  | 302 (59.2) | 155(54)    | 147(65.04) | 0.01    | 83(63.36)  | 219(57.78) | 0.3     | 64(53.33)          | 238(61.03) | 0.13    |
|                                                                                                                                                        | Yes | 208 (40.8) | 129(45.42) | 79(34.96)  |         | 48(36.64)  | 160(42.22) |         | 56(46.67)          | 152(38.97) |         |
| <b>Presence of nurse or other healthcare staff</b>                                                                                                     |     |            |            |            |         |            |            |         |                    |            |         |
|                                                                                                                                                        | No  | 284 (55.7) | 143(50.35) | 141(62.39) | 0.007   | 75(57.25)  | 209(55.15) | 0.68    | 58(48.33)          | 226(57.95) | 0.07    |
|                                                                                                                                                        | Yes | 226 (44.3) | 141(49.65) | 85(37.61)  |         | 56(42.75)  | 170(44.85) |         | 62(51.67)          | 164(42.05) |         |
| <b>Presence of family member</b>                                                                                                                       |     |            |            |            |         |            |            |         |                    |            |         |
|                                                                                                                                                        | No  | 297 (58.2) | 152(53.52) | 145(64.16) | 0.01    | 68(51.91)  | 229(60.42) | 0.1     | 67(55.83)          | 230(58.97) | 0.59    |
|                                                                                                                                                        | Yes | 213 (41.8) | 132(46.48) | 81(35.84)  |         | 63(48.09)  | 150(39.58) |         | 53(44.17)          | 160(41.03) |         |

**Notes:** Conducting interview in multibedded room, emergency department, or with presence of nurse or family member will affect the answer of those who aged ≥40 years

**Table S8. Would conducting the interview in ... affect your answers to questions about smoking, illicit drugs, or illegal sexual behaviors?**

| Characteristics, No. (%)                           |     | Total      | Age, yrs   |               | P value | Sex           |               | P value | Graduate or higher |               | P value |
|----------------------------------------------------|-----|------------|------------|---------------|---------|---------------|---------------|---------|--------------------|---------------|---------|
|                                                    |     |            | <40        | ≥40           |         | Man           | Woman         |         | No                 | Yes           |         |
|                                                    |     |            | n=510      | 284<br>(55.7) |         | 226<br>(44.3) | 131<br>(25.7) |         | 379<br>(74.3)      | 120<br>(23.5) |         |
| <b>Private room or clinic</b>                      |     |            |            |               |         |               |               |         |                    |               |         |
|                                                    | No  | 362 (71)   | 202(71.13) | 160(70.80)    | 1       | 99(75.57)     | 263(69.39)    | 0.21    | 76(63.33)          | 286(73.33)    | 0.03    |
|                                                    | Yes | 148 (29)   | 82(28.87)  | 66(29.20)     |         | 32(24.43)     | 116(30.61)    |         | 44(36.67)          | 104(26.67)    |         |
| <b>Multibed room</b>                               |     |            |            |               |         |               |               |         |                    |               |         |
|                                                    | No  | 247 (48.4) | 127(44.72) | 120(53.10)    | 0.06    | 63(48.09)     | 184(48.55)    | 1       | 57(47.50)          | 190(48.72)    | 0.83    |
|                                                    | Yes | 263 (51.6) | 157(55.28) | 106(46.90)    |         | 68(51.91)     | 195(51.45)    |         | 63(52.50)          | 200(51.28)    |         |
| <b>Emergency department</b>                        |     |            |            |               |         |               |               |         |                    |               |         |
|                                                    | No  | 259 (50.8) | 135(47.46) | 124(54.87)    | 0.1     | 70(53.44)     | 189(49.87)    | 0.54    | 56(46.67)          | 203(52.05)    | 0.34    |
|                                                    | Yes | 251 (49.2) | 149(52.46) | 102(45.13)    |         | )             | 190(50.13)    |         | 64(53.33)          | 187(47.95)    |         |
| <b>Presence of nurse or other healthcare staff</b> |     |            |            |               |         |               |               |         |                    |               |         |
|                                                    | No  | 266 (52.2) | 139(48.94) | 127(56.19)    | )0.1    | 73(55.73)     | 193(50.92)    | 0.36    | 58(48.33)          | 208(53.33)    | 0.34    |
|                                                    | Yes | 244 (47.8) | 145(51.06) | 99(43.81)     |         | 58(44.27)     | 186(49.08)    |         | 62(51.67)          | 182(46.67)    |         |
